# Supplementary figures and images for: Electrochemical Behavior and Regulation of Eu(II)/Eu(III) Redox Couple in Molten Fluorides
Source: Research Square preprint supplement (doi:10.21203/rs.3.rs-7043544/v1), 2025-08-18

**Supplementary materials**


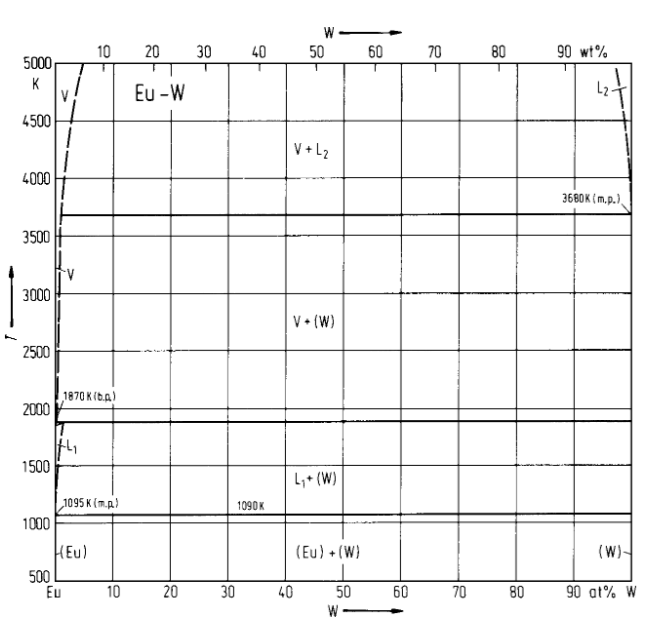


**Fig. S1:** Eu-W phase diagram

Supplement: Supplementary file 1 [file cdd07f8f06f53122ff74929b.docx]
